# Supplementary material for: Ternary Pt/SnOx/TiO2 photocatalysts for hydrogen production: consequence of Pt sites for synergy of dual co-catalysts
Source: Royal Society of Chemistry journal article supplement (doi:10.1039/c4cp01496k), 2014-01-01
Supplement: c4cp01496k1.pdf [file c4cp01496k1.pdf]

## **Electronic Supplementary Information**

### **Ternary Pt/SnO<sub>x</sub>/TiO<sub>2</sub> photocatalysts for hydrogen production: Consequence of Pt sites for synergy of dual co-catalysts**

Quan Gu, Jinlin Long\*, Huaqiang Zhuang, Chaoqiang Zhang, Yangen Zhou, and Xuxu Wang \*

Research Institute of Photocatalysis, Fujian Provincial Key Laboratory of Photocatalysis--State Key

Laboratory Breeding Base, Fuzhou University, Fuzhou 350002, China

E-mail: [jllong@fzu.edu.cn](mailto:jllong@fzu.edu.cn) ; [xwang@fzu.edu.cn](mailto:xwang@fzu.edu.cn)

Personal URL: <http://chem.fzu.edu.cn/szdw/teacherinfo.aspx?id=40>

Tel: +86-591-83779121; fax: +86-591-83779121

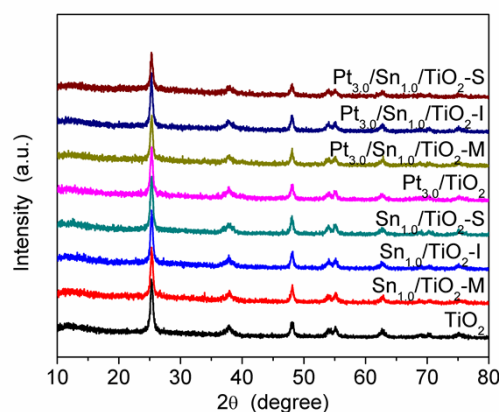

**Fig. S1** The XRD patterns of  $\text{TiO}_2$ ,  $\text{Pt}_{3.0}/\text{TiO}_2$ ,  $\text{Sn}_{1.0}/\text{TiO}_2$  samples prepared by different methods, and  $\text{Pt}_{3.0}/\text{Sn}_{1.0}-\text{TiO}_2$  samples prepared by different methods.

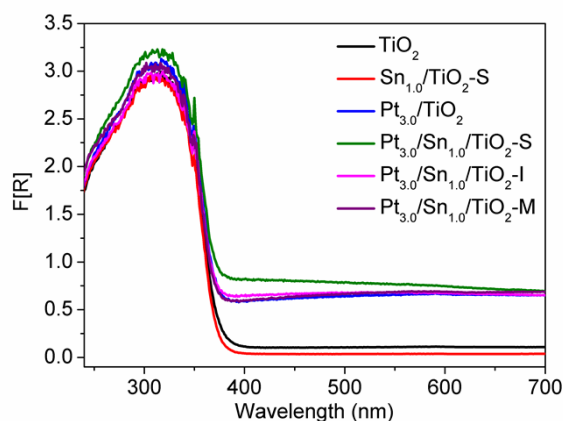

**Fig. S2** UV-vis diffuse reflectance spectra of samples

Figure S2 shows UV-Vis DRS spectra of  $\text{Sn}_{1.0}/\text{TiO}_2\text{-S}$ ,  $\text{Pt}_{3.0}/\text{TiO}_2$ ,  $\text{Pt}_{3.0}/\text{Sn}_{1.0}/\text{TiO}_2\text{-S}$ ,  $\text{Pt}_{3.0}/\text{Sn}_{1.0}/\text{TiO}_2\text{-I}$  and  $\text{Pt}_{3.0}/\text{Sn}_{1.0}/\text{TiO}_2\text{-M}$  samples. Clearly, UV-Vis DRS spectrum of  $\text{Sn}_{1.0}/\text{TiO}_2\text{-S}$  is coincide with that of  $\text{TiO}_2$ , indicating that Sn modification results in no alterations in the optical absorption properties of  $\text{TiO}_2$ . The spectra of the all Pt loaded samples ( $\text{Pt}_{3.0}/\text{TiO}_2$ ,  $\text{Pt}_{3.0}/\text{Sn}_{1.0}/\text{TiO}_2\text{-S}$ ,  $\text{Pt}_{3.0}/\text{Sn}_{1.0}/\text{TiO}_2\text{-I}$  and  $\text{Pt}_{3.0}/\text{Sn}_{1.0}/\text{TiO}_2\text{-M}$ ) show an enhanced absorption in the visible-light region but the shape and optical absorption threshold of the spectra is similar with that of parent  $\text{TiO}_2$ . According to the reference (J. Yu, L. Qi, M. Jaroniec, *J. Phys. Chem. C* 2010, **114**, 13118.), absorption in visible light region is due to the fact that highly dispersed platinum nanoparticles can absorb nearly all the incident light. Therefore, this result can further confirms that the Pt nanoparticles are highly dispersed onto surface of samples and closely contacted with  $\text{TiO}_2$ .

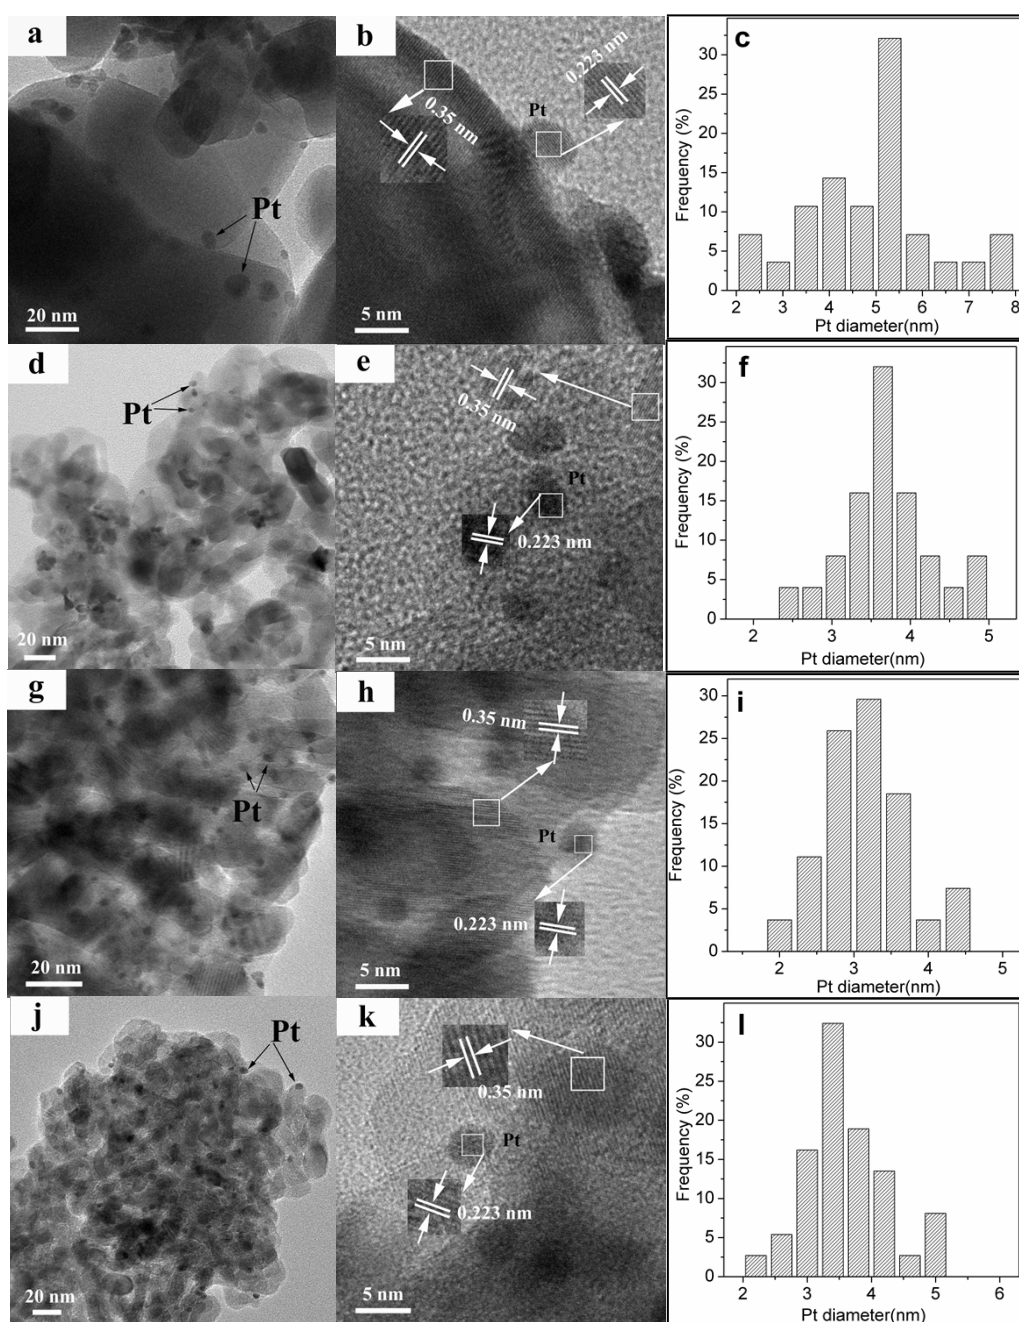

**Fig. S3** TEM and HRTEM images of Pt<sub>3.0</sub>/SnO<sub>2</sub> (a and b), Sn<sub>1.0</sub>/Pt<sub>3.0</sub>/TiO<sub>2</sub>-M (d and e), Sn<sub>1.0</sub>/Pt<sub>3.0</sub>/TiO<sub>2</sub>-I (g and h), and Sn<sub>1.0</sub>/Pt<sub>3.0</sub>/TiO<sub>2</sub>-S (j and k) samples. The statistical size distributions of Pt particles on Pt<sub>3.0</sub>/SnO<sub>2</sub> (c), Sn<sub>1.0</sub>/Pt<sub>3.0</sub>/TiO<sub>2</sub>-M (f), Sn<sub>1.0</sub>/Pt<sub>3.0</sub>/TiO<sub>2</sub>-I (i), and Sn<sub>1.0</sub>/Pt<sub>3.0</sub>/TiO<sub>2</sub>-S (l).

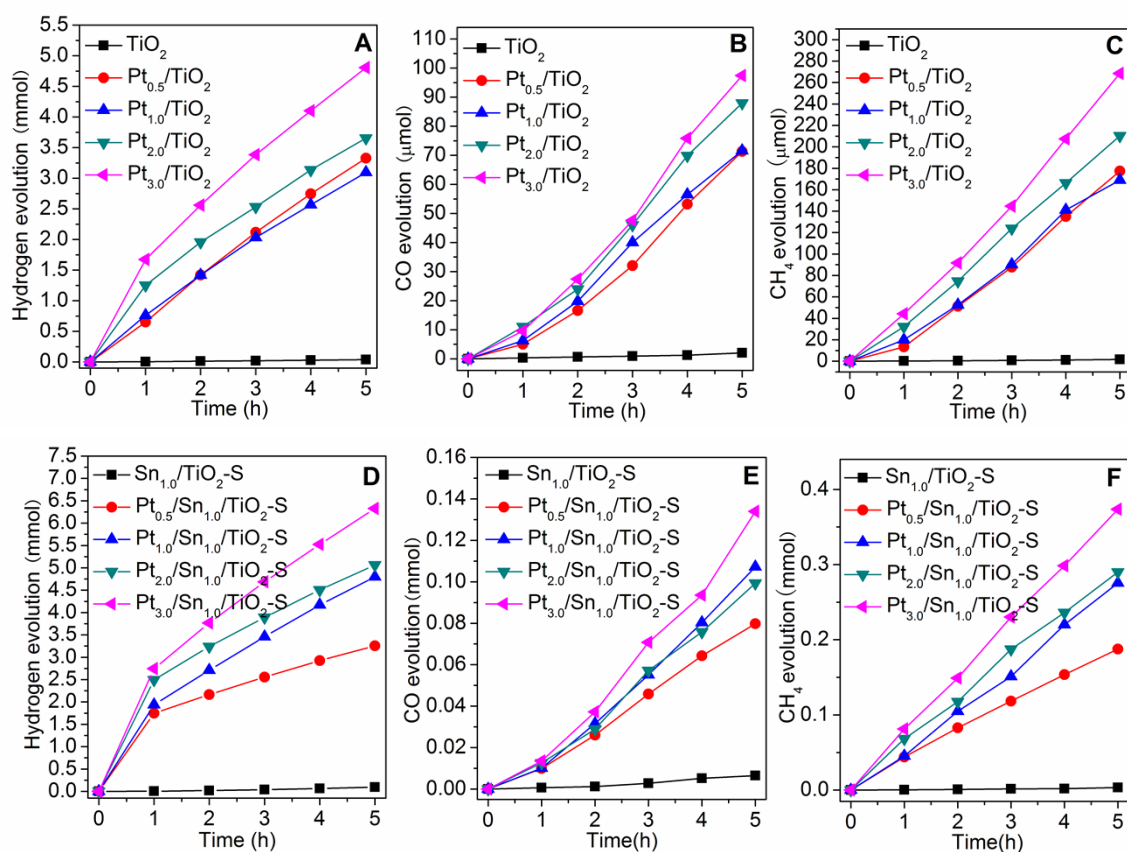

**Fig. S4** The generation of H<sub>2</sub> (A and D), CO (B and E), and CH<sub>4</sub> (C and F) from the ethanol solution over the Pt<sub>x</sub>/TiO<sub>2</sub> and Pt<sub>x</sub>/Sn<sub>1.0</sub>/TiO<sub>2</sub>-S with different Pt contents, respectively.

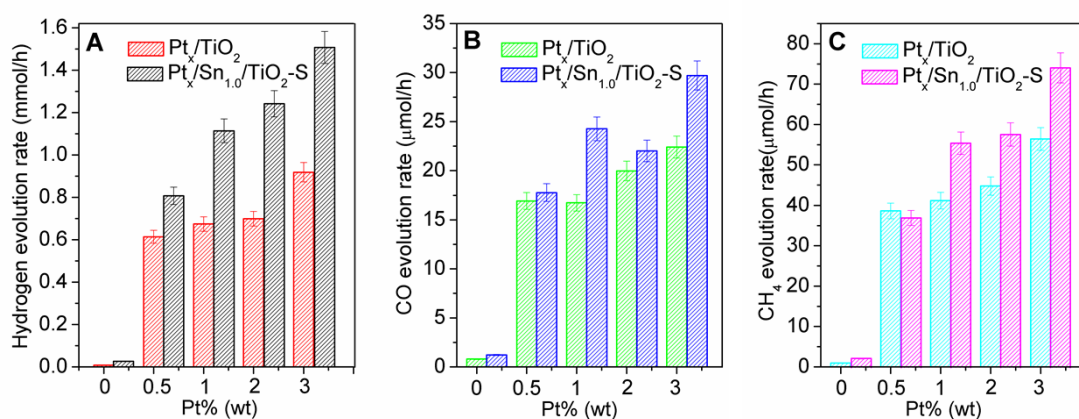

**Fig. S5.** The production rates of H<sub>2</sub> (A), CO (B), and CH<sub>4</sub> (C) from ethanol solution over the Pt<sub>x</sub>/TiO<sub>2</sub> and Pt<sub>x</sub>/Sn<sub>1.0</sub>/TiO<sub>2</sub>-S with different Pt contents

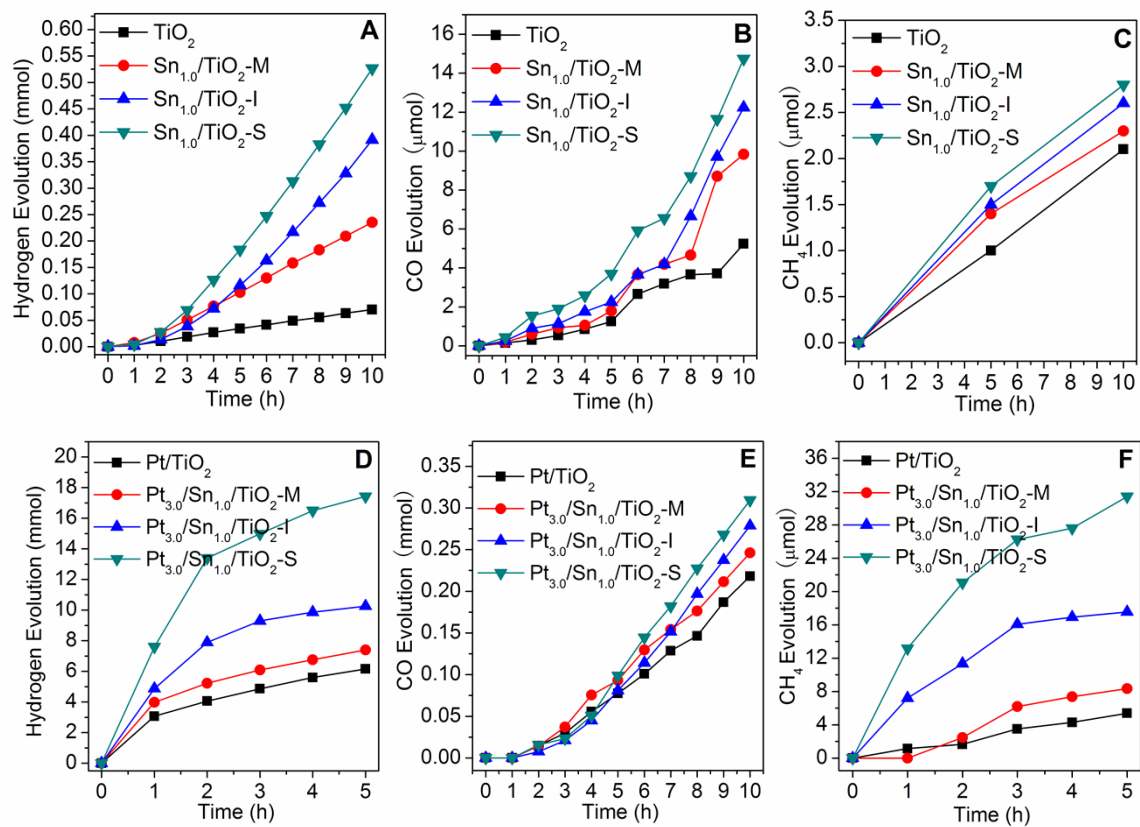

**Fig. S6** The generation of H<sub>2</sub> (A and D), CO (B and E), and CH<sub>4</sub> (C and F) from the methanol solution over the Sn<sub>1.0</sub>/TiO<sub>2</sub> and Pt<sub>3.0</sub>/Sn<sub>1.0</sub>/TiO<sub>2</sub> prepared by different methods, respectively

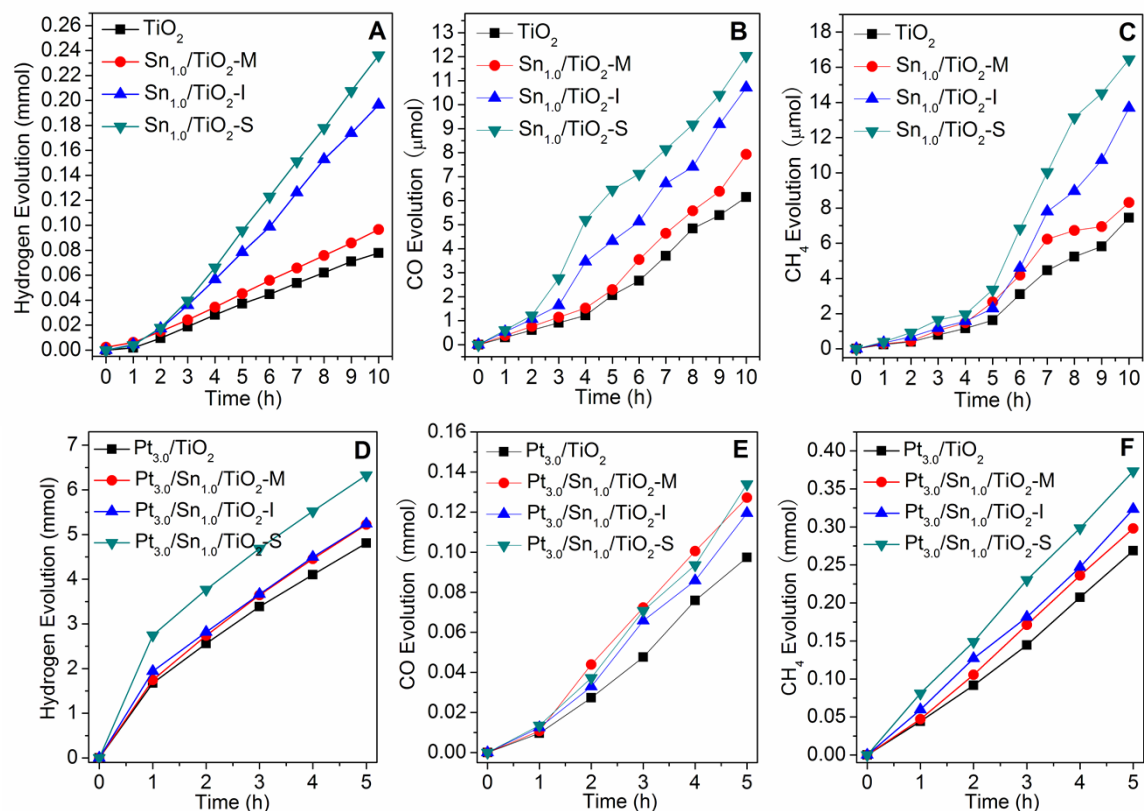

**Fig. S7** The generation of H<sub>2</sub> (A and D), CO (B and E), and CH<sub>4</sub> (C and F) from the ethanol solution over the Sn<sub>1.0</sub>/TiO<sub>2</sub> and Pt<sub>3.0</sub>/Sn<sub>1.0</sub>/TiO<sub>2</sub> prepared by different methods, respectively

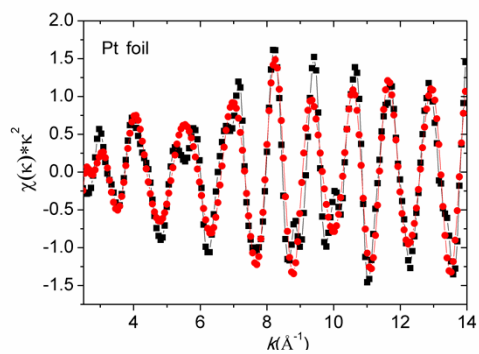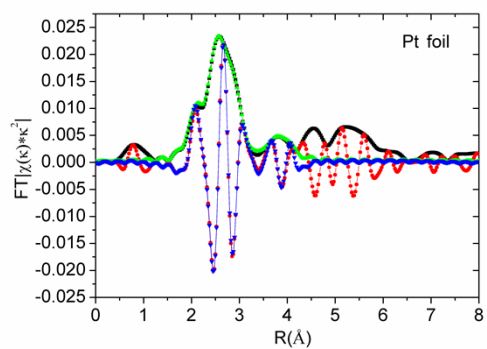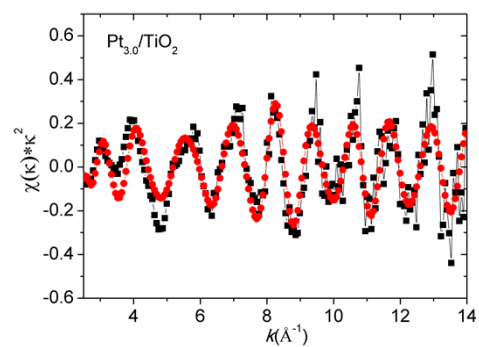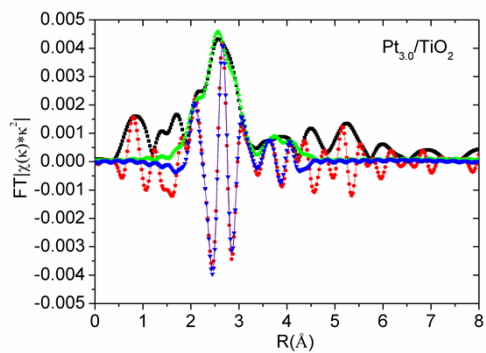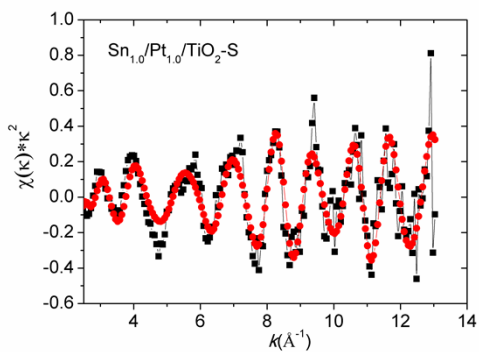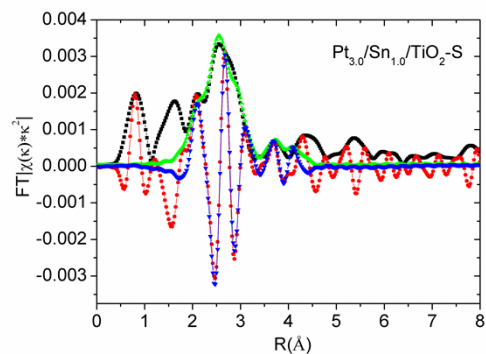

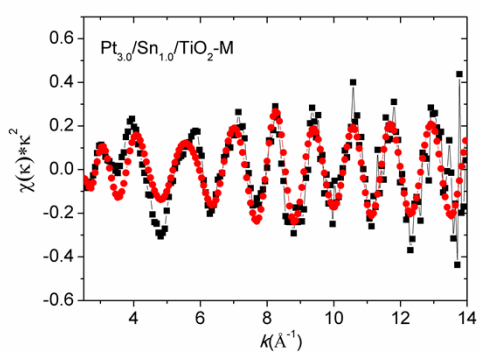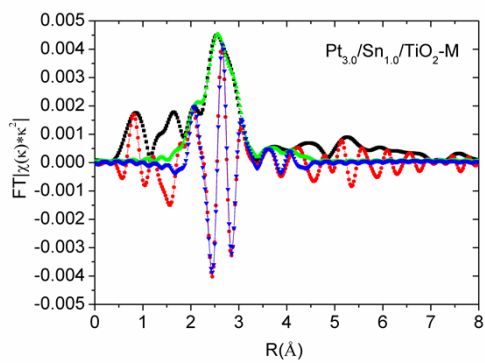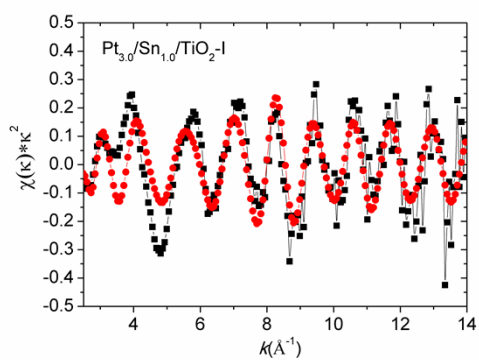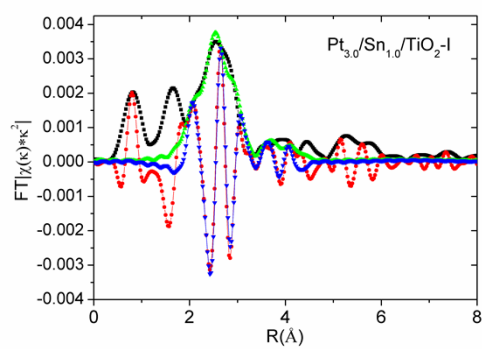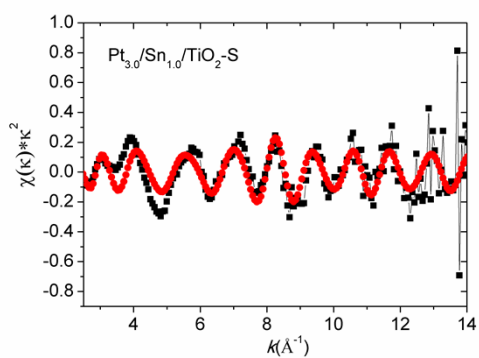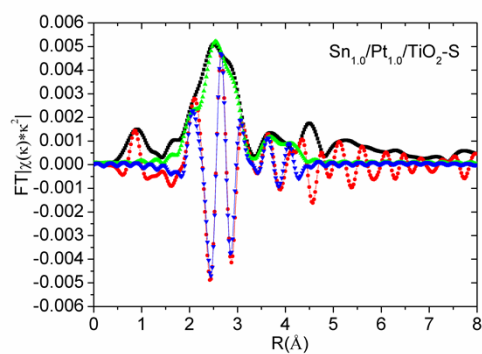



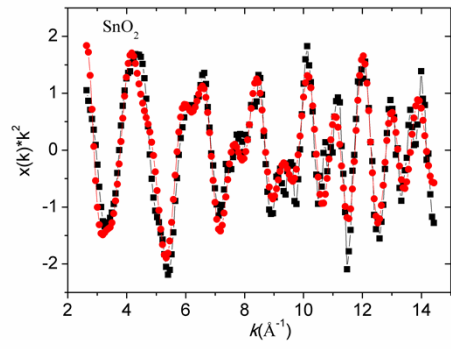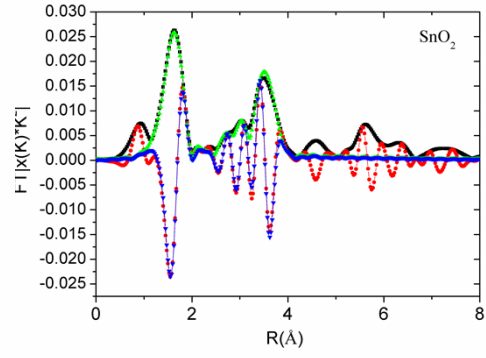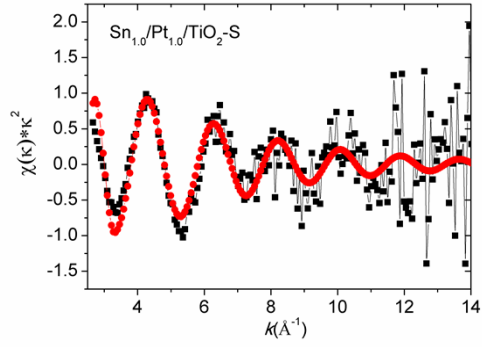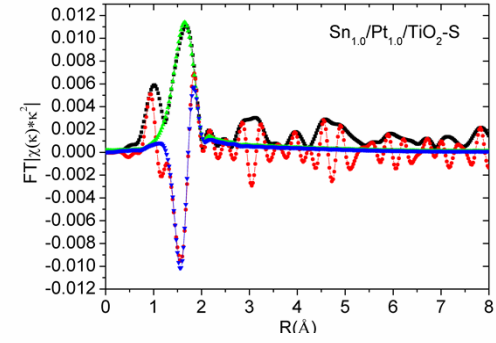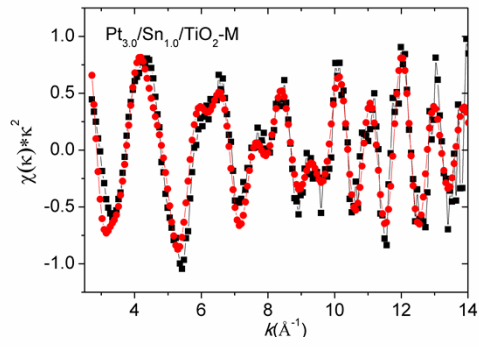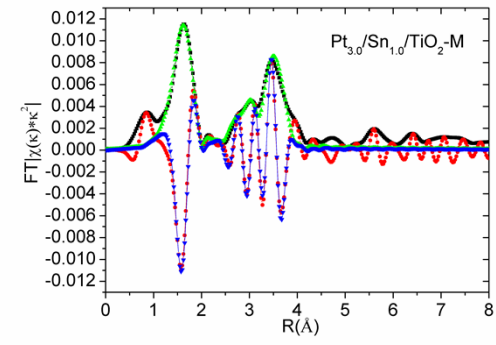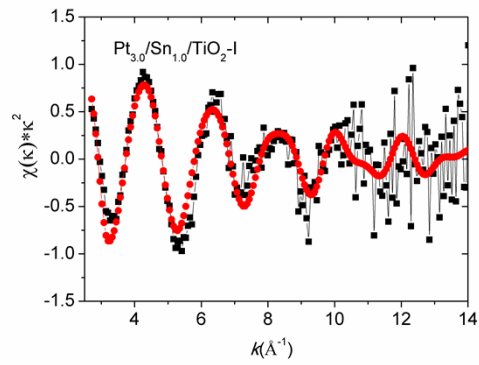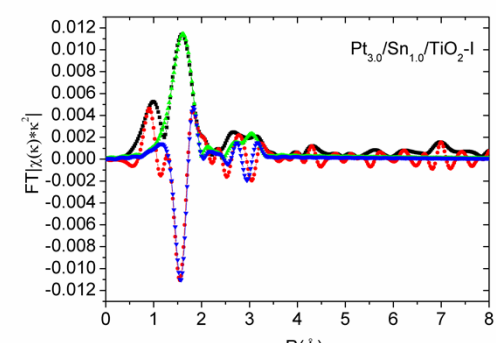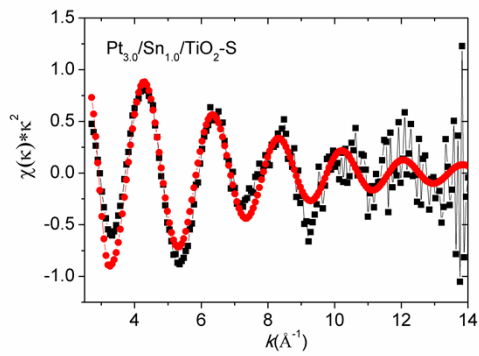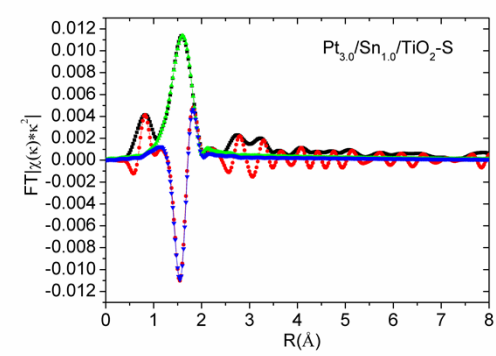

**Fig. S8** Pt L<sub>III</sub>-edge and Sn K-edge EXAFS fit results.

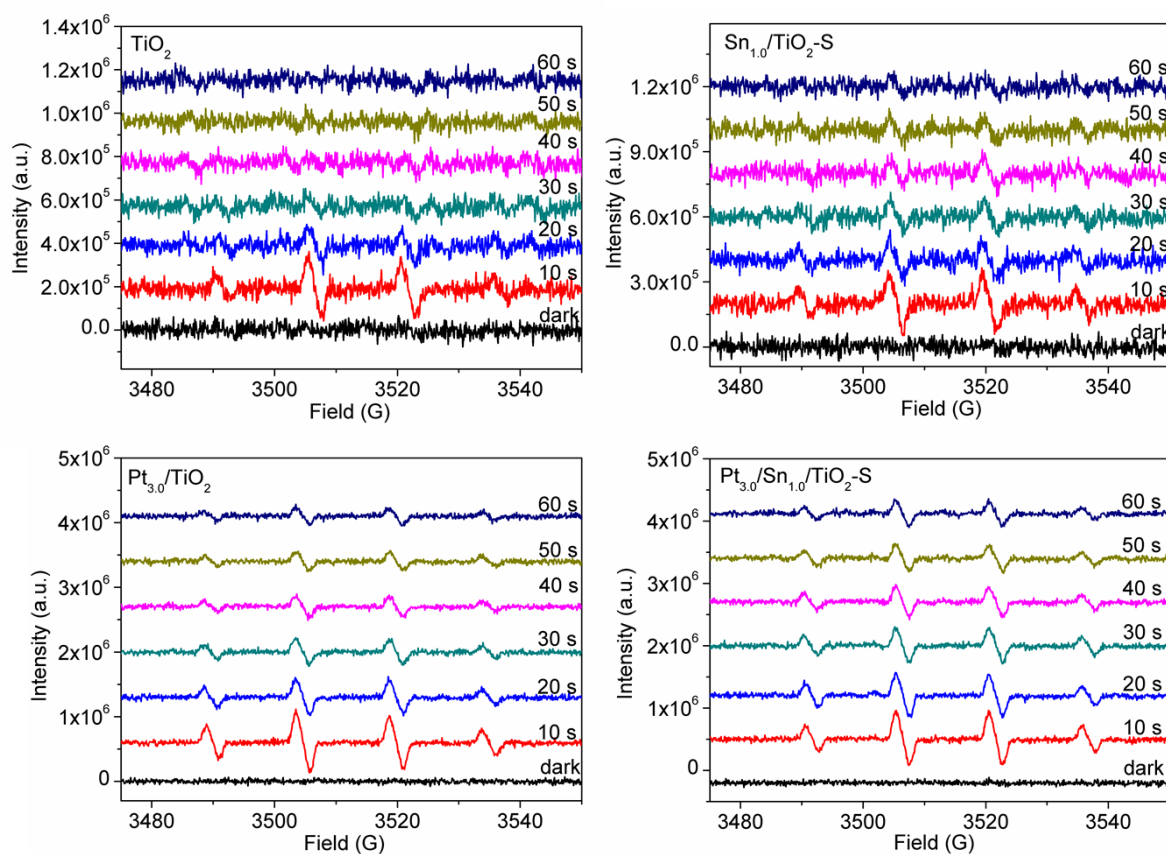

**Fig. S9** The changes of EPR signal of the DMPO-•OH spin adducts in the suspension of  $\text{TiO}_2$ ,  $\text{Sn}_{1.0}/\text{TiO}_2\text{-S}$ ,  $\text{Pt}_{3.0}/\text{TiO}_2$ , and  $\text{Pt}_{3.0}/\text{Sn}_{1.0}/\text{TiO}_2\text{-S}$  with 365 nm light irradiation time, respectively.

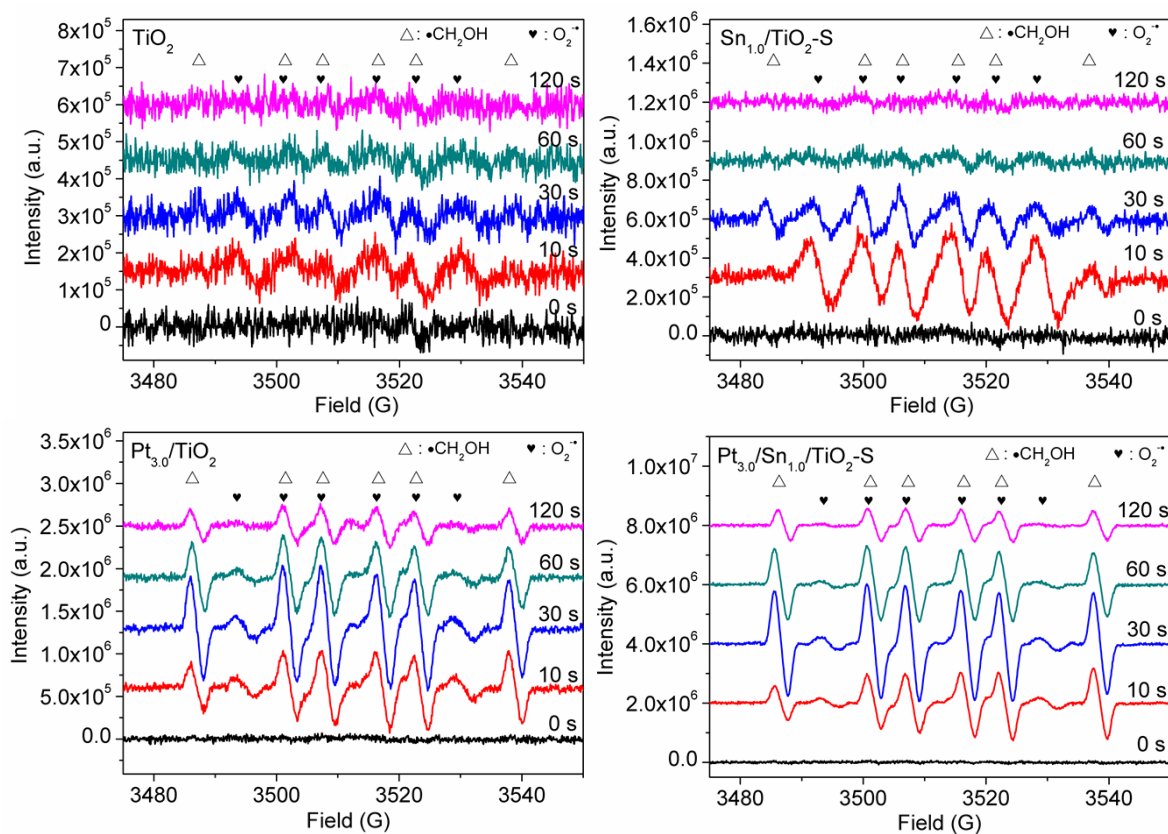

**Fig. S10** EPR spectra of TiO<sub>2</sub>, Sn<sub>1.0</sub>/TiO<sub>2</sub>-S, Pt<sub>3.0</sub>/TiO<sub>2</sub>, and Pt<sub>3.0</sub>/Sn<sub>1.0</sub>/TiO<sub>2</sub>-S dispersed in DMPO/methanol with 365 nm light irradiation.
